# Supplementary material for: Efficacy and Safety of COVID-19 Vaccines in Phase III Trials: A Meta-Analysis
Source: MDPI journal article supplement (doi:10.3390/vaccines9060582), 2021-06-01
Supplement: s1 [file s1]

## **Efficacy and Safety of COVID-19 Vaccines in Phase III Trials: A Meta-Analysis**

Haoyue Cheng <sup>1,2</sup>, Zhicheng Peng <sup>1,2</sup>, Wenliang Luo <sup>1,2</sup>, Shuting Si <sup>1,2</sup>, Minjia Mo <sup>1,2</sup>, Haibo Zhou <sup>1,2</sup>,  
Xing Xin<sup>1,2</sup>, Hui Liu <sup>3</sup>, Yunxian Yu <sup>1,2,\*</sup>

1. Department of Public Health and Department of Anesthesiology, the Second Affiliated Hospital of Zhejiang University School of Medicine, Hangzhou, China
2. Department of Epidemiology & Health Statistics, School of Public Health, School of Medicine, Zhejiang University, Hangzhou, China
3. Sir Run Run Shaw Hospital, School of Medicine, Zhejiang University

\* Correspondence: [yunxianyu@zju.edu.cn](mailto:yunxianyu@zju.edu.cn)

**Table S1.** Literature search terms used for PubMed. The final search strategy applied to conduct this meta-analysis is reported at step #21.

| #  | Search strategy                                                                                                                        |
|----|----------------------------------------------------------------------------------------------------------------------------------------|
| 1  | corona virus OR coronavirus                                                                                                            |
| 2  | coronavirinae                                                                                                                          |
| 3  | coronaviridae                                                                                                                          |
| 4  | betacoronavirus OR beta coronavirus                                                                                                    |
| 5  | COVID19 OR COVID 19 OR COVID2019 OR COVID 2019                                                                                         |
| 6  | nCoV                                                                                                                                   |
| 7  | "CoV 2" OR CoV2                                                                                                                        |
| 8  | 2019nCoV OR 2019 nCoV                                                                                                                  |
| 9  | severe acute respiratory syndrome coronavirus 2                                                                                        |
| 10 | SARS CoV 2 OR sarscov2                                                                                                                 |
| 11 | #1 OR #2 OR #3 OR #4 OR #5 OR #6 OR #7 OR #8 OR #9 OR #10                                                                              |
| 12 | vaccin*[tiab]                                                                                                                          |
| 13 | immuniz*[tiab]                                                                                                                         |
| 14 | inocul*[tiab]                                                                                                                          |
| 15 | #12 OR #13 OR #14                                                                                                                      |
| 16 | #11 AND #15 (12345)                                                                                                                    |
| 17 | "COVID19 vaccin*" OR "anti-sars-cov-2 agent" OR anti-sarscov2 agent OR "sars-cov-2 vaccine"                                            |
| 18 | #16 OR #17 (13128)                                                                                                                     |
| 19 | Humans[Mesh] OR human*[tiab] OR volunteer*[tiab] OR participant*[tiab] OR subject*[tiab] OR people[tiab]                               |
| 20 | (clinical[tiab] AND trial[tiab]) OR clinical trials as topic[Mesh] OR clinical trial[pt] OR random*[tiab] OR "random allocation"[Mesh] |
| 21 | #18 AND #19 AND #20 (806)                                                                                                              |

**Table S2.** Literature search terms used for the Cochrane Library. The final search strategy applied to conduct this meta-analysis is reported at step #23.

| #  | Search strategy                                                                                                               |
|----|-------------------------------------------------------------------------------------------------------------------------------|
| 1  | MeSH descriptor: [Coronavirus] explode all trees                                                                              |
| 2  | MeSH descriptor: [Coronavirus Infections] explode all trees                                                                   |
| 3  | MeSH descriptor: [Coronaviridae] explode all trees                                                                            |
| 4  | MeSH descriptor: [Betacoronavirus] explode all trees                                                                          |
| 5  | coronavir* OR corona virus OR betacoronavir* OR beta coronavirus                                                              |
| 6  | MeSH descriptor: [COVID-19] explode all trees                                                                                 |
| 7  | COVID19 OR COVID 19 OR COVID 2019                                                                                             |
| 8  | nCoV OR CoV 2 OR CoV2 OR 2019 nCoV                                                                                            |
| 9  | MeSH descriptor: [SARS-CoV-2] explode all trees                                                                               |
| 10 | severe acute respiratory syndrome coronavirus 2 OR SARS CoV 2 OR sarscov2                                                     |
| 11 | #1 OR #2 OR #3 OR #4 OR #5 OR #6 OR #7 OR #8 OR #9 OR #10                                                                     |
| 12 | MeSH descriptor: [Vaccines] explode all trees                                                                                 |
| 13 | MeSH descriptor: [Immunization] explode all trees                                                                             |
| 14 | (vaccin*):ti,ab,kw OR (immuniz*):ti,ab,kw OR (inocul*):ti,ab,kw                                                               |
| 15 | #12 OR #13 OR #14                                                                                                             |
| 16 | #11 AND #15 (481)                                                                                                             |
| 17 | MeSH descriptor: [COVID-19 Vaccines] explode all trees                                                                        |
| 18 | COVID19 Vaccin* OR COVID 19 Vaccin* OR anti sars cov 2 agent OR anti sarscov2 agent OR sars cov 2 vaccin* OR sarscov2 vaccin* |
| 19 | #17 OR #18                                                                                                                    |
| 20 | #16 OR #19 (532)                                                                                                              |
| 21 | (human*):ti,ab,kw OR (volunteer*):ti,ab,kw OR (participant*):ti,ab,kw OR (subject*):ti,ab,kw OR (people*):ti,ab,kw            |
| 22 | ("clinical trial"):ti,ab,kw OR (random*):ti,ab,kw OR (clinical trial):ti,ab,kw                                                |
| 23 | #20 AND #21 AND #22 (301)                                                                                                     |
| 24 | trial: 277                                                                                                                    |

**Table S3.** Literature search terms used for Embase. The final search strategy applied to conduct this meta-analysis is reported at step #19.

| #  | Search strategy                                                                                                                                      |
|----|------------------------------------------------------------------------------------------------------------------------------------------------------|
| 1  | coronavirus OR "corona virus"                                                                                                                        |
| 2  | Coronavirinae'/exp OR Coronavirinae                                                                                                                  |
| 3  | Coronaviridae'/exp OR Coronaviridae                                                                                                                  |
| 4  | Betacoronavirus'/exp OR 'Betacoronavirus' OR 'beta coronavirus'                                                                                      |
| 5  | coronavirus disease 2019'/exp OR 'coronavirus disease 2019' OR 'COVID-19' OR COVID19 OR sarscov2 OR 'COVID-2019' OR COVID2019                        |
| 6  | Severe acute respiratory syndrome coronavirus 2'/exp OR 'Severe acute respiratory syndrome coronavirus 2' OR 'nCoV' OR 'SARS-CoV-2'                  |
| 7  | "CoV 2" OR CoV2                                                                                                                                      |
| 8  | "2019-nCoV" OR 2019nCoV                                                                                                                              |
| 9  | #1 OR #2 OR #3 OR #4 OR #5 OR #6 OR #7 OR #8                                                                                                         |
| 10 | vaccine'/exp OR vaccin*:ti,ab,kw                                                                                                                     |
| 11 | immunization'/exp OR immuniz*:ti,ab,kw                                                                                                               |
| 12 | inocul*:ti,ab,kw                                                                                                                                     |
| 13 | #10 OR #11 OR #12                                                                                                                                    |
| 14 | #9 AND #13 (14701)                                                                                                                                   |
| 15 | anti-sars-cov-2 agent'/exp OR 'anti-sars-cov-2 agent' OR 'sars-cov-2 vaccine'/exp OR 'sars-cov-2 vaccine' OR "covid19 vaccin*" OR "covid 19 vaccin*" |
| 16 | #14 OR #15 (15952)                                                                                                                                   |
| 17 | human'/exp OR human:ti,ab,kw OR volunteer*:ti,ab,kw OR participant*:ti,ab,kw OR subject*:ti,ab,kw OR people:ti,ab,kw                                 |
| 18 | clinical trial (topic)/exp OR 'randomization'/exp OR randomization:ti,ab,kw OR (clinical trial):ti,ab,kw OR random*:ti,ab,kw                         |
| 19 | #16 AND #17 AND #18 (1355)                                                                                                                           |

**Table S4.** Literature search terms used for Medrxiv, Wanfang and CNKI.

| Database | Search strategy                                                                                               |
|----------|---------------------------------------------------------------------------------------------------------------|
| Medrxiv  | COVID-19 AND vaccin* AND "clinical trials" (4920)                                                             |
| Wanfang  | (主题:(新型冠状病毒) OR 主题:(新冠病毒) OR 主题:(新型冠状病毒肺炎) OR 主题:(新冠肺炎)) AND 主题:(疫苗) AND (主题:(临床试验) OR 主题:(随机)) (同义词扩展) (102) |
| CNKI     | TKA=('新型冠状病毒'+ '新冠病毒'+ '新型冠状病毒肺炎'+ '新冠肺炎') and TKA=('疫苗') and TKA=('临床试验+随机') (同义词扩展) (94)                    |

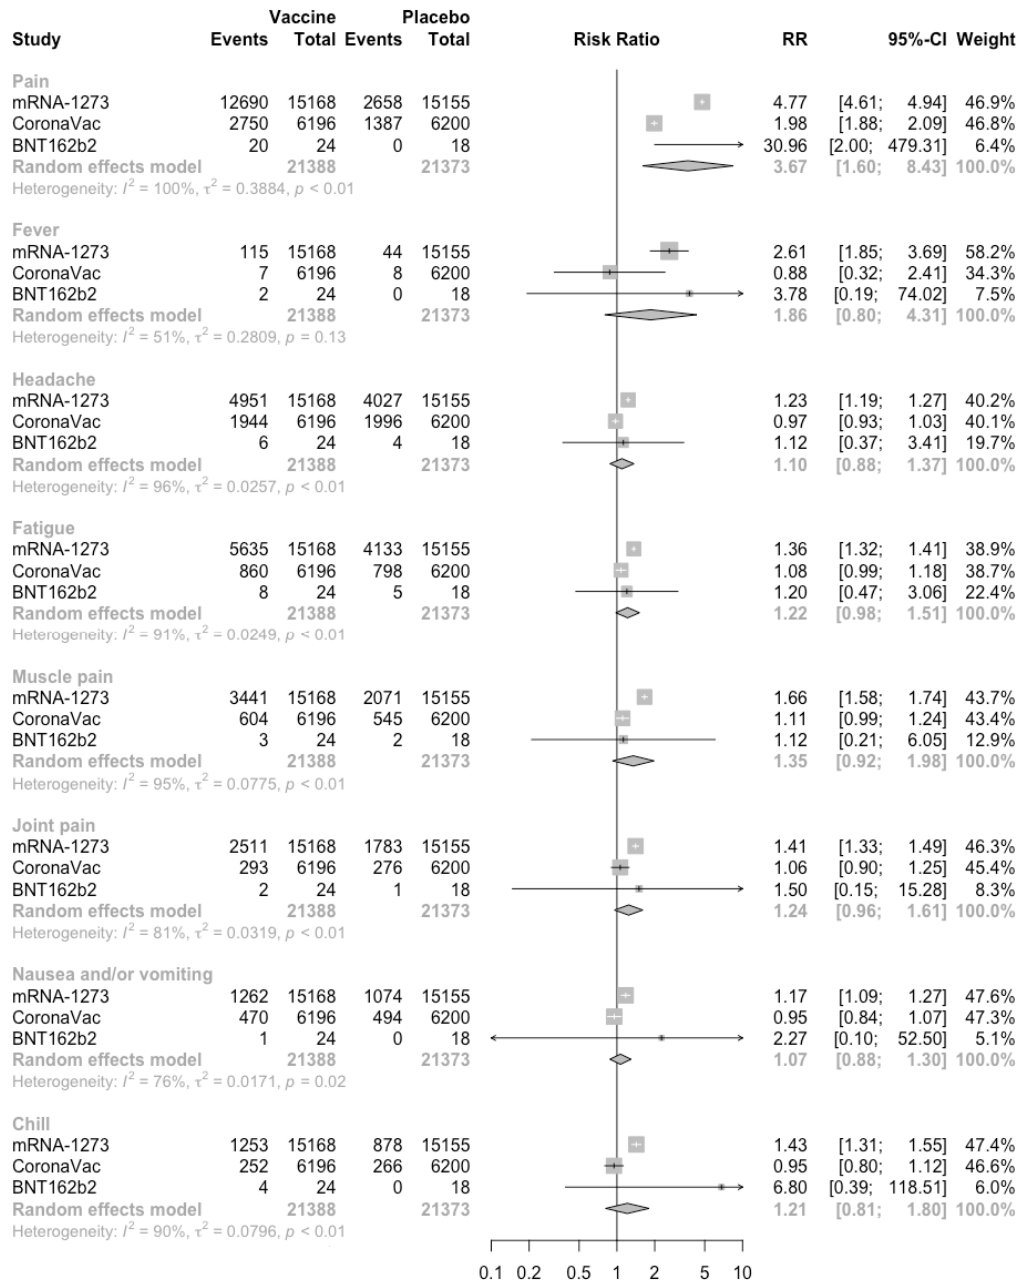

**Figure S1.** Meta-analysis of effect of vaccine on specific adverse events between vaccine and placebo groups after dose 1

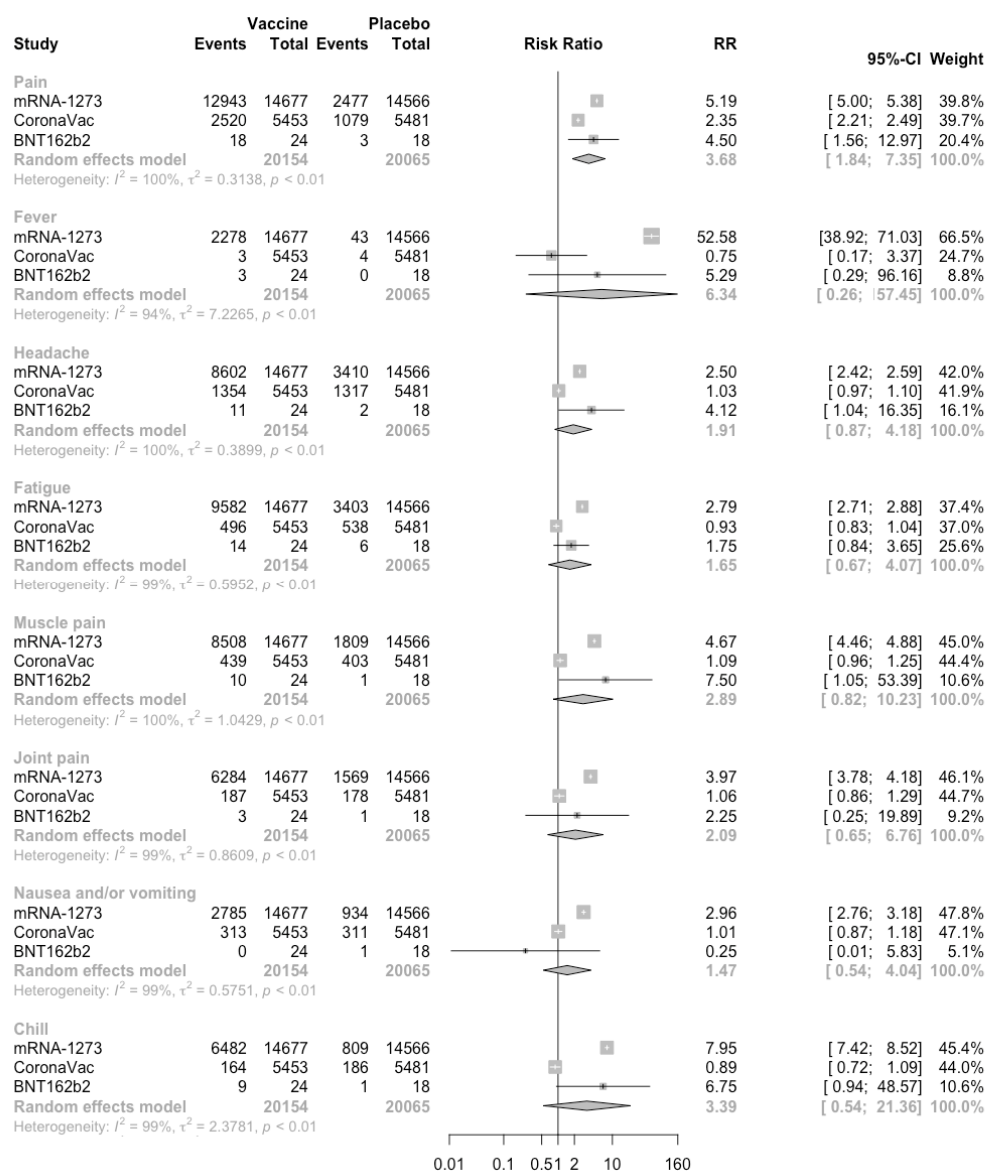

**Figure S2.** Meta-analysis of effect of vaccine on specific adverse events between vaccine and placebo groups after dose 2
